# Supplementary material for: Genomic Identification and Functional Characterization of Essential Genes in Caenorhabditis elegans
Source: PubMed Central journal article supplement (PMC5844317; doi:10.1534/g3.117.300338), 2018-01-15
Supplement: 981FileS1.pdf [file 981FileS1.pdf]

**Table 1. List of 60 essential genes from 104 lethal mutations identified on chromosome III(mid) and chromosome V(left)**

| Allele                | Chr | Variation | Position | Mutation | Amino acid effect | Amino acid change | Affected gene           | Evidence | Evidence supporting lethal phenotype* | Comment                              |
|-----------------------|-----|-----------|----------|----------|-------------------|-------------------|-------------------------|----------|---------------------------------------|--------------------------------------|
| <i>let-702(s2483)</i> | III | SNV       | 7359885  | G->A     | nonsense          | W>*               | <i>hmgr-1(F08F8.2)</i>  | PCR      | <i>tm4368</i> and RNAi                | <i>tm4368</i> curated and published. |
| <i>let-702(s2813)</i> | III | SNV       | 7360261  | C->T     | missense          | P>S               | <i>hmgr-1(F08F8.2)</i>  | WGS      |                                       |                                      |
| <i>let-712(s2439)</i> | III | SNV       | 8169268  | G->A     | nonsense          | W>*               | <i>prp-8(C50C3.6)</i>   | WGS      | <i>rr40</i> and RNAi                  | <i>rr40</i> curated and published.   |
| <i>let-712(s2598)</i> | III | SNV       | 8166973  | G->A     | nonsense          | W>*               | <i>prp-8(C50C3.6)</i>   | WGS      |                                       |                                      |
| <i>let-786(s2631)</i> | III | SNV       | 8353810  | C->T     | missense          | T>I               | <i>unc-116(R05D3.7)</i> | WGS      | <i>rh24</i> and RNAi                  | <i>unc-116</i> published.            |
| <i>let-727(s2589)</i> | III | SNV       | 5482194  | G->A     | nonsense          | W>*               | <i>R02F2.7</i>          | WGS      | RNAi                                  |                                      |
| <i>let-728(s2573)</i> | III | SNV       | 6205725  | G->A     | nonsense          | Y>*               | <i>C23G10.8</i>         | WGS      | <i>gk3389</i> and RNAi                | <i>gk3389</i> curated NOT published. |
| <i>let-728(s2573)</i> | III | SNV       | 6205892  | T->A     | missense          | D>N               | <i>C23G10.8</i>         | WGS      |                                       |                                      |
| <i>let-732(s2611)</i> | III | SNV       | 4943615  | C->T     | missense          | S>L               | <i>rpb-2(C26E6.4)</i>   | WGS      | <i>ok2893</i> and RNAi                | <i>ok2893</i> curated NOT published. |
| <i>let-732(s2808)</i> | III | SNV       | 4943991  | C->T     | nonsense          | Q>*               | <i>rpb-2(C26E6.4)</i>   | WGS      |                                       |                                      |
| <i>let-832(s2817)</i> | III | SNV       | 5556761  | G->A     | missense          | E>K               | <i>hach-1(F09F7.4)</i>  | WGS      | RNAi                                  |                                      |
| <i>let-736(s2577)</i> | III | SNV       | 4337800  | G->A     | missense          | R>Q               | <i>cdk-12(B0285.1)</i>  | WGS      | <i>tm3846</i> and RNAi                | <i>tm3846</i> curated NOT published. |
| <i>let-741(s2810)</i> | III | SNV       | 4914874  | G->A     | missense          | E>K               | <i>rars-1(F26F4.10)</i> | WGS      | <i>gc47</i> and RNAi                  | <i>gc47</i> curated and published.   |
| <i>let-741(s2476)</i> | III | SNV       | 4914975  | G->A     | missense          | R>K               | <i>rars-1(F26F4.10)</i> | WGS      |                                       |                                      |
| <i>let-743(s2581)</i> | III | SNV       | 7764786  | T->A     | nonsense          | L>*               | <i>ZK686.2</i>          | WGS      | <i>tm5978</i> and RNAi                | <i>tm5978</i> curated NOT published. |
| <i>let-743(s2830)</i> | III | SNV       | 7765501  | C->T     | nonsense          | Q>*               | <i>ZK686.2</i>          | WGS      |                                       |                                      |
| <i>let-747(s2807)</i> | III | SNV       | 6461537  | G->A     | nonsense          | W>*               | <i>algn-1(T26A5.4)</i>  | PCR      | RNAi                                  |                                      |
| <i>let-747(s2456)</i> | III | SNV       | 6461808  | G->A     | missense          | D>N               | <i>algn-1(T26A5.4)</i>  | WGS      |                                       |                                      |

|                       |     |           |         |              |               |      |                          |     |                        |                                      |
|-----------------------|-----|-----------|---------|--------------|---------------|------|--------------------------|-----|------------------------|--------------------------------------|
| <i>let-752(s2619)</i> | III | 1Del      | 7706605 | delG         | frameshift    |      | <i>lin-13(C03B8.4)</i>   | WGS | <i>n770</i> and RNAi   | <i>n779</i> curated and published.   |
| <i>let-753(s2605)</i> | III | SNV       | 5226777 | G->A         | splice signal |      | <i>C34E10.10</i>         | PCR | None                   |                                      |
| <i>let-753(s2614)</i> | III | SNV       | 5227554 | G->T         | missense      | D>Y  | <i>C34E10.10</i>         | WGS |                        |                                      |
| <i>let-757(s2460)</i> | III | 1Ins      | 7631830 | G            | frameshift    |      | <i>fbn-1(ZK783.1)</i>    | WGS | <i>tm290</i> and RNAi  | failed to complement <i>let-821</i>  |
| <i>let-757(s2867)</i> | III | SNV       | 7638442 | G->A         | missense      | C>Y  | <i>fbn-1(ZK783.1)</i>    | WGS |                        | <i>tm290</i> curated                 |
| <i>let-821(s2804)</i> | III | SNV       | 7626858 | G->A         | missense      | C>Y  | <i>fbn-1(ZK783.1)</i>    | WGS |                        | NOT published.                       |
| <i>let-763(s2580)</i> | III | SNV       | 4267912 | G->A         | nonsense      | W>*  | <i>sftb-1(T08A11.2)</i>  | WGS | RNAi                   |                                      |
| <i>let-764(s2616)</i> | III | 1Del      | 6932404 | 4nt deletion | frameshift    |      | <i>byn-1(F57B9.5)</i>    | WGS | <i>tm4451</i> and RNAi | <i>tm4451</i> curated NOT published. |
| <i>let-771(s2442)</i> | III | SNV       | 7022627 | G->A         | missense      | G>E  | <i>rfl-1(F11H8.1.2)</i>  | WGS | <i>or198</i> and RNAi  | <i>or198</i> curated and published.  |
| <i>let-774(s2615)</i> | III | SNV       | 6207832 | C->T         | nonsense      | Q>*  | <i>rps-3(C23G10.3.2)</i> | WGS | RNAi                   | rescue assay                         |
| <i>let-782(s2591)</i> | III | SNV       | 4705658 | G->A         | missense      | C>Y  | <i>tag-189(T04A8.12)</i> | WGS | <i>gk285</i>           | <i>gk285</i> curated NOT published.  |
| <i>let-784(s2602)</i> | III | SNV       | 5260831 | G->A         | missense      | E>K  | <i>gop-3(C34E10.1.2)</i> | WGS | <i>tm3269</i> and RNAi | <i>tm3269</i> curated NOT published. |
| <i>let-798(s2850)</i> | III | SNV       | 5725120 | T->A         | nonsense      | C>*  | <i>wrm-1(B0336.1)</i>    | WGS | <i>ne1982</i> and RNAi | <i>ne1982</i> curated and published. |
| <i>let-799(s2852)</i> | III | SNV       | 5851950 | G->A         | missense      | G>E  | <i>ddx-23(F01F1.7)</i>   | WGS | RNAi                   |                                      |
| <i>let-826(s2820)</i> | III | SNV       | 4936540 | G->A         | nonsense      | W->* | <i>mrps-18C(C26E6.6)</i> | PCR | RNAi                   |                                      |
| <i>let-826(S2811)</i> | III | SNV       | 4936112 | G->A         | nonsense      | W->* | <i>mrps-18C(C26E6.6)</i> | WGS |                        |                                      |
| <i>let-827(S2827)</i> | III | 1Del+1Ins | 4913180 | delGinsA     | frameshift    |      | <i>cee-1(F26F4.1)</i>    | WGS | RNAi                   |                                      |

|                       |     |      |         |      |               |      |                          |     |                        |                                      |
|-----------------------|-----|------|---------|------|---------------|------|--------------------------|-----|------------------------|--------------------------------------|
| <i>let-829(S2826)</i> | III | SNV  | 5229181 | G->A | missense      | G>R  | <i>atp-2(C34E10.6)</i>   | WGS | <i>ua2</i> and RNAi    | <i>ua2</i> curated and published.    |
| <i>let-972(s2441)</i> | III | 1Ins | 8446444 | G    | frameshift    |      | <i>hsp-110(C30C11.4)</i> | PCR | <i>gk533</i> and RNAi  | <i>gk553</i> NOT curated.            |
| <i>let-972(s2583)</i> | III | SNV  | 8446436 | G->A | missense      | V->M | <i>hsp-110(C30C11.4)</i> | WGS |                        |                                      |
| <i>let-326(s1404)</i> | V   | SNV  | 1263600 | C->T | nonsense      | W>*  | <i>rab-1(C39F7.4)</i>    | WGS | <i>tm2603</i> and RNAi | <i>tm2603</i> curated NOT published. |
| <i>let-326(s238)</i>  | V   | SNV  | 1263843 | G->A | missense      | S>F  | <i>rab-1(C39F7.4)</i>    | WGS |                        |                                      |
| <i>let-332(s234)</i>  | V   | SNV  | 7243996 | G->A | nonsense      | Q>*  | <i>C05C8.7</i>           | WGS | RNAi                   |                                      |
| <i>let-332(s369)</i>  | V   | SNV  | 7245765 | G->A | missense      | T>I  | <i>C05C8.7</i>           | WGS |                        |                                      |
| <i>let-335(s1439)</i> | V   | SNV  | 7856077 | A->T | nonsense      | K>*  | <i>C37C3.2</i>           | WGS |                        |                                      |
| <i>let-335(s1476)</i> | V   | SNV  | 7856451 | G->A | missense      | C>Y  | <i>C37C3.2</i>           | WGS | RNAi                   |                                      |
| <i>let-342(s1029)</i> | V   | SNV  | 4632154 | G->A | missense      | D>N  | <i>pmt-2(F54D11.1)</i>   | WGS | <i>ok2419</i> and RNAi | <i>ok2419</i> curated NOT published. |
| <i>let-342(s1442)</i> | V   | SNV  | 4631873 | C->T | missense      | S>F  | <i>pmt-2(F54D11.1)</i>   | WGS |                        |                                      |
| <i>let-343(s1025)</i> | V   | SNV  | 7179311 | G->A | missense      | G>D  | <i>cpsf-2(F09G2.4)</i>   | WGS | RNAi                   |                                      |
| <i>let-343(s1428)</i> | V   | SNV  | 7180252 | C->T | nonsense      | Q>*  | <i>cpsf-2(F09G2.4)</i>   | WGS |                        |                                      |
| <i>let-346(s1575)</i> | V   | SNV  | 7208502 | G->A | nonsense      | R>*  | <i>soap-1(C13F10.4)</i>  | WGS | <i>tm5803</i> and RNAi | <i>tm5803</i> curated NOT published. |
| <i>let-346(s1619)</i> | V   | SNV  | 7209026 | G->A | nonsense      | Q>*  | <i>soap-1(C13F10.4)</i>  | WGS | <i>tm5803</i> and RNAi |                                      |
| <i>let-348(s1436)</i> | V   | SNV  | 4441757 | G->A | missense      | S>F  | <i>rft-1(Y47D7A.16)</i>  | WGS | RNAi                   |                                      |
| <i>let-348(s1622)</i> | V   | SNV  | 4439195 | C->T | nonsense      | W>*  | <i>rft-1(Y47D7A.16)</i>  | PCR |                        |                                      |
| <i>let-402(s127)</i>  | V   | SNV  | 6435516 | G->A | missense      | G>E  | <i>erfa-1(T05H4.6)</i>   | WGS | RNAi                   |                                      |
| <i>let-402(s1526)</i> | V   | SNV  | 6434336 | C->T | missense      | S>L  | <i>erfa-1(T05H4.6)</i>   | WGS |                        |                                      |
| <i>let-410(s1565)</i> | V   | SNV  | 6708760 | C->T | splice signal |      | <i>dlst-1(W02F12.5)</i>  | WGS | RNAi                   |                                      |
| <i>let-410(s815)</i>  | V   | SNV  | 6707665 | G->A | missense      | S>F  | <i>dlst-1(W02F12.5)</i>  | WGS |                        |                                      |

|                       |   |               |                              |      |               |     |                         |                 |                        |                                         |                                         |
|-----------------------|---|---------------|------------------------------|------|---------------|-----|-------------------------|-----------------|------------------------|-----------------------------------------|-----------------------------------------|
| <i>let-415(s1505)</i> | V | SNV           | 4826120                      | G->A | missense      | S>F | <i>hsp-6(C37H5.8)</i>   | WGS             | <i>tm515</i> and RNAi  | <i>tm515</i> curated<br>NOT published.  |                                         |
| <i>let-415(s1525)</i> | V | SNV           | 4825181                      | A->T | missense      | I>Y | <i>hsp-6(C37H5.8)</i>   | WGS             |                        |                                         |                                         |
| <i>let-419(s1483)</i> | V | SNV           | 5051195                      | C->T | nonsense      | Q>* | <i>pqn-51(K11D12.2)</i> | WGS             | RNAi                   |                                         |                                         |
| <i>let-419(s1539)</i> | V | SNV           | 5051774                      | C->T | nonsense      | Q>* | <i>pqn-51(K11D12.2)</i> | WGS             |                        |                                         |                                         |
| <i>let-424(s1587)</i> | V | SNV           | 8033082                      | C->T | nonsense      | Q>* | <i>vars-1(ZC513.4)</i>  | WGS             | RNAi                   |                                         |                                         |
| <i>let-424(s384)</i>  | V | SNV           | 8033150                      | G->A | nonsense      | W>* | <i>vars-1(ZC513.4)</i>  | WGS             |                        |                                         |                                         |
| <i>let-428(s1070)</i> | V | SNV           | 4691491                      | C->T | nonsense      | R>* | <i>K03B4.1</i>          | WGS             | RNAi                   |                                         |                                         |
| <i>let-428(s1490)</i> | V | SNV           | 4691043                      | G->A | missense      | G>D | <i>K03B4.1</i>          | WGS             |                        |                                         |                                         |
| <i>let-463(s2168)</i> | V | rearrangement | breakpoint: 5916530..5917732 |      |               |     |                         | <i>C04E6.11</i> | WGS                    | <i>tm4214</i>                           | <i>tm4214</i> curated<br>NOT published. |
| <i>let-439(s1407)</i> | V | SNV           | 5940676                      | G->A | nonsense      | W>* | <i>M03F8.3</i>          | WGS             | RNAi                   |                                         |                                         |
| <i>let-439(s1503)</i> | V | SNV           | 5940035                      | G->A | missense      | M>I | <i>M03F8.3</i>          | WGS             |                        |                                         |                                         |
| <i>let-443(s1417)</i> | V | SNV           | 5940509                      | C->T | nonsense      | Q>* | <i>M03F8.3</i>          | WGS             |                        |                                         |                                         |
| <i>let-440(s1411)</i> | V | SNV           | 5306632                      | G->A | splice signal |     | <i>ncx-2(C10G8.5)</i>   | WGS             | <i>tm4571</i> and RNAi | <i>tm4571</i> curated<br>NOT published. |                                         |
| <i>let-440(s1440)</i> | V | SNV           | 5306878                      | G->A | missense      | E>K | <i>ncx-2(C10G8.5)</i>   | WGS             |                        |                                         |                                         |
| <i>let-442(s1416)</i> | V | SNV           | 7232261                      | A->T | nonsense      | K>* | <i>C05C8.2</i>          | WGS             | RNAi                   |                                         |                                         |
| <i>let-442(s1430)</i> | V | SNV           | 7231630                      | G->A | nonsense      | W>* | <i>C05C8.2</i>          | WGS             |                        |                                         |                                         |
| <i>let-455(s1447)</i> | V | SNV           | 4184746                      | C->T | nonsense      | W>* | <i>Y45G5AM.9</i>        | WGS             | None                   |                                         |                                         |
| <i>let-455(s1511)</i> | V | SNV           | 4184551                      | C->T | nonsense      | W>* | <i>Y45G5AM.9</i>        | WGS             |                        |                                         |                                         |
| <i>let-422(s1548)</i> | V | SNV           | 5684545                      | C->T | missense      | G>R | <i>hmgs-1(F25B4.6)</i>  | WGS             | RNAi                   |                                         |                                         |
| <i>let-422(s1563)</i> | V | SNV           | 5684347                      | G->A | missense      | S>F | <i>hmgs-1(F25B4.6)</i>  | WGS             |                        |                                         |                                         |

|                       |   |                |                                    |      |               |     |                          |     |                        |                                      |
|-----------------------|---|----------------|------------------------------------|------|---------------|-----|--------------------------|-----|------------------------|--------------------------------------|
| <i>let-411(s1453)</i> | V | SNV            | 7806113                            | G->A | nonsense      | W>* | <i>xpo-1(ZK742.1)</i>    | WGS | RNAi                   |                                      |
| <i>let-411(s1595)</i> | V | SNV            | 7806685                            | C->T | nonsense      | Q>* | <i>xpo-1(ZK742.1)</i>    | WGS |                        |                                      |
| <i>let-334(s383)</i>  | V | SNV            | 8540346                            | G->A | missense      | P>S | <i>slc-17.8(F25G6.7)</i> | WGS | None                   |                                      |
| <i>let-334(s908)</i>  | V | SNV            | 8541157                            | G->A | missense      | A>V | <i>slc-17.8(F25G6.7)</i> | WGS |                        |                                      |
| <i>let-409(s1480)</i> | V | SNV            | 8546796                            | G->A | missense      | G>E | <i>asns-1(F25G6.6)</i>   | WGS | RNAi                   |                                      |
| <i>let-409(s823)</i>  | V | large deletion | 8545461..8547038                   |      |               |     | <i>asns-1(F25G6.6)</i>   | WGS |                        |                                      |
| <i>let-409(s1507)</i> | V | SNV            | 8548170                            | T->A | nonsense      | K>* | <i>asns-1(F25G6.6)</i>   | PCR | RNAi                   |                                      |
| <i>let-331(s1608)</i> | V | SNV            | 4715842                            | C->T | missense      | G>E | <i>prx-6(F39G3.7)</i>    | WGS |                        |                                      |
| <i>let-331(s427)</i>  | V | large deletion | 4718927..4719368                   |      |               |     | <i>prx-6(F39G3.7)</i>    | WGS | RNAi                   |                                      |
| <i>let-327(s1458)</i> | V | SNV            | 1986666                            | C->T | nonsense      | R>* | <i>T08B1.1</i>           | PCR |                        |                                      |
| <i>let-327(s1496)</i> | V | SNV            | 1986588                            | G->A | nonsense      | Q>* | <i>T08B1.1</i>           | WGS | RNAi                   |                                      |
| <i>let-417(s1679)</i> | V | 1Del+2Ins      | 5317072<br>G-TC                    | G->C | frameshift    | Y>* | <i>ceh-34(C10G8.6)</i>   | WGS |                        | <i>tm3733</i> and RNAi               |
| <i>let-417(s204)</i>  | V | SNV            | 5317187                            | C->T | missense      | R>Q | <i>ceh-34(C10G8.6)</i>   | WGS |                        |                                      |
| <i>let-350(s2126)</i> | V | rearrangement  | breakpoint: 4828640..4834790       |      |               |     | <i>C37H5.5</i>           | WGS | RNAi                   |                                      |
| <i>let-350(s250)</i>  | V | SNV            | 4829444                            | G->A | splice signal |     | <i>C37H5.5</i>           | WGS |                        |                                      |
| <i>let-338(s503)</i>  | V | 1Del           | 4200817                            |      | frameshift    |     | <i>rpc-40(H43I07.2)</i>  | WGS | <i>ok3654</i> and RNAi | <i>ok3654</i> curated NOT published. |
| <i>let-338(s1020)</i> | V | rearrangement  | breakpoints: 4202166..4202306 + AA |      |               |     | <i>rpc-40(H43I07.2)</i>  | WGS |                        |                                      |
| <i>let-420(s1046)</i> | V | SNV            | 4821165                            | G->A | missense      | P>L | <i>adss-1(C37H5.6)</i>   | WGS | RNAi                   |                                      |
| <i>let-420(s1058)</i> | V | SNV            | 4821048                            | G->A | missense      | G>E | <i>adss-1(C37H5.6)</i>   | PCR |                        |                                      |

|                       |   |               |                   |      |               |     |                        |                      |  |                        |                                                                            |
|-----------------------|---|---------------|-------------------|------|---------------|-----|------------------------|----------------------|--|------------------------|----------------------------------------------------------------------------|
| <i>let-447(s1654)</i> | V | rearrangement | breakpoint: 41000 |      |               |     | <i>egl-8(B0348.4)</i>  | WGS                  |  | WGS                    | <i>egl-8</i> published.                                                    |
| <i>let-447(s1457)</i> | V |               |                   |      |               |     | <i>egl-8(B0348.4)</i>  | complementation test |  |                        |                                                                            |
| <i>let-459(s1615)</i> | V | SNV           | 4346291           | C->T | splice signal |     | <i>hpo-18(F32D1.2)</i> | WGS                  |  | ok3436 and RNAi        | ok3436 curated NOT published.                                              |
| <i>let-459(s1432)</i> |   |               |                   |      |               |     | <i>hpo-18(F32D1.2)</i> | complementation test |  |                        |                                                                            |
| <i>let-470(s1581)</i> | V | SNV           | 9516186           | G->A | splice signal |     | <i>F11A3.2</i>         | WGS                  |  | RNAi                   |                                                                            |
| <i>let-470(s1629)</i> | V |               |                   |      |               |     | <i>F11A3.2</i>         | rescue assay         |  |                        |                                                                            |
| <i>let-408(s827)</i>  | V | SNV           | 8132990           | G->A | nonsense      | W>* | <i>snap-1(D1014.3)</i> | WGS                  |  | <i>tm2068</i> and RNAi | <i>tm2068</i> curated NOT published.                                       |
| <i>let-423(s1550)</i> | V | SNV           | 7832305           | C->T | nonsense      | Q>* | <i>mig-6(C37C3.6)</i>  | WGS                  |  | <i>ev788</i> and RNAi  | <i>ev788</i> curated and published.                                        |
| <i>let-344(s1555)</i> | V | big deletion  | 4540156..4563301  |      |               |     | <i>sos-1(T28F12.3)</i> | WGS                  |  | WGS                    | <i>let-344</i> is <i>let-341</i> , with multiple lethal alleles published. |

\* "Evidence supporting lethal phenotype shows that alleles or RNAi evidence from WormBase support lethal phenotypes. However, no direct complementation test performed between these alleles and our sequenced alleles.

(1) 12 genes (2 with only tm alleles) highlighted in green were published with lethal alleles. Five of those genes *unc-116*, *lin-13*, *egl-8*, *sos-1* and *mig-6* were published prior to (JOHNSEN AND BAILLIE 1991; STEWART *et al.* 1998) for *let-786*, *let-752*, and (JOHNSEN AND BAILLIE (1991) for *let-447*, *let-344* and *let-423*. Therefore, *let-786* is *unc-116*, *let-752* is *lin-13*, *let-447* is *egl-8*, *let-344* is *sos-1* and *let-423* is *mig-6*. The other seven were first published in STEWART *et al.* (1998) and JOHNSEN AND BAILLIE (1991) and therefore the 'let' names in those publications takes precedent. (2) 18 genes (all of the alleles listed are gk, tm, or ok) in black have known lethal alleles which have not been curated and characterized and whose correct names were first published in STEWART *et al.* (1998) or JOHNSEN AND BAILLIE (1991). (3) 31 genes highlighted in red have no alleles in WormBase. Their gene names are published in STEWART *et al.* (1998) or JOHNSEN AND BAILLIE (1991).

**Table 2. A total of 86 strains with eT1(III;V)**

| Strain | <i>let-x(allele)</i>  | Block <sup>1</sup> | Mapping zone |
|--------|-----------------------|--------------------|--------------|
| BC9247 | <i>let-350(s2126)</i> | Not noted          | 10           |
| BC9296 | <i>let-407(s2122)</i> | Not noted          | 20B          |
| BC9246 | <i>let-417(s1679)</i> | Not noted          | 10           |
| BC9306 | <i>let-447(s1654)</i> | MEL egg let        | 1B1          |
| BC9254 | <i>let-349(s502)</i>  | Early              | 11B1         |
| BC9316 | <i>let-338(s503)</i>  | Mid <sup>2</sup>   | 8A2          |
| BC9235 | <i>let-420(s723)</i>  | Sterile            | 10           |
| BC9286 | <i>let-408(s827)</i>  | Egg <sup>3</sup>   | 17           |
| BC9295 | <i>let-409(s823)</i>  | Early              | 19           |
| BC9262 | <i>let-410(s815)</i>  | Mid                | 14           |
| BC9314 | <i>let-426(s826)</i>  | Mid                | 5            |
| BC9312 | <i>let-326(s1404)</i> | Early <sup>4</sup> | 4A           |
| BC9248 | <i>let-327(s1496)</i> | Slow <sup>5</sup>  | 6A           |
| BC9280 | <i>let-335(s1439)</i> | Early              | 16           |
| BC9278 | <i>let-335(s1476)</i> | Early              | 16           |
| BC9275 | <i>let-339(s1444)</i> | Early              | 15           |
| BC9271 | <i>let-339(s1469)</i> | Early/Mid          | 15           |
| BC9292 | <i>let-340(s1508)</i> | Early              | 19           |
| BC9242 | <i>let-342(s1442)</i> | Early              | 9B           |
| BC9277 | <i>let-343(s1428)</i> | Early/Mid          | 15           |
| BC9225 | <i>let-344(s1555)</i> | Mid                | 9A           |
| BC9232 | <i>let-345(s1452)</i> | Mid                | 9B           |
| BC9315 | <i>let-346(s1575)</i> | Mid/Late           | 15           |
| BC9276 | <i>let-346(s1619)</i> | Mid                | 15           |
| BC9230 | <i>let-348(s1436)</i> | Early              | 9A           |
| BC9238 | <i>let-348(s1622)</i> | Early              | 9A           |
| BC9267 | <i>let-402(s1526)</i> | Early              | 12A          |

<sup>1</sup> Block describes the developmental blocking stage of the recovered lethal alleles.

<sup>2</sup> Mid: Mid larval lethal (worm's length 0.3-0.5mm)

<sup>3</sup> Egg: Embryogenesis

<sup>4</sup> Early: Early larval lethal (worm's length 0.2-0.3mm)

<sup>5</sup> Slow: Slow developing

|        |                       |                       |      |
|--------|-----------------------|-----------------------|------|
| BC9266 | <i>let-403(s1482)</i> | Early                 | 12B  |
| BC9311 | <i>let-407(s1631)</i> | Hatch <sup>6</sup>    | 20B  |
| BC9321 | <i>let-409(s1480)</i> | Hatch                 | 19   |
| BC9263 | <i>let-410(s1565)</i> | Mid                   | 14   |
| BC9282 | <i>let-411(s1453)</i> | Mid                   | 16   |
| BC9281 | <i>let-411(s1595)</i> | Mid                   | 16   |
| BC9255 | <i>let-415(s1505)</i> | Late                  | 10   |
| BC9272 | <i>let-415(s1525)</i> | Early                 | 10   |
| BC9243 | <i>let-419(s1483)</i> | Early/Mid             | 10   |
| BC9234 | <i>let-419(s1539)</i> | Early/Mid             | 10   |
| BC9289 | <i>let-422(s1548)</i> | Early                 | 11B5 |
| BC9258 | <i>let-422(s1563)</i> | Early                 | 11B5 |
| BC9283 | <i>let-423(s1550)</i> | Hatches               | 16   |
| BC9301 | <i>let-424(s1587)</i> | Sterile               | 17   |
| BC9233 | <i>let-426(s1527)</i> | Early                 | 5    |
| BC9251 | <i>let-428(s1490)</i> | Sterile               | 10   |
| BC9250 | <i>let-439(s1407)</i> | Early                 | 11B2 |
| BC9259 | <i>let-439(s1503)</i> | Early                 | 11B2 |
| BC9318 | <i>let-440(s1411)</i> | Hatch                 | 10   |
| BC9253 | <i>let-440(s1440)</i> | Hatches               | 10   |
| BC9310 | <i>let-442(s1416)</i> | Early/Mid             | 15   |
| BC9269 | <i>let-442(s1430)</i> | Early/Mid             | 15   |
| BC9319 | <i>let-443(s1417)</i> | Early                 | 11A1 |
| BC3048 | <i>let-444(s1418)</i> | Early                 | 12A  |
| BC9256 | <i>let-444(s1459)</i> | Mid                   | 12A  |
| BC9313 | <i>let-447(s1457)</i> | Maternal <sup>7</sup> | 1B1  |
| BC9226 | <i>let-455(s1447)</i> | Early                 | 8A2  |
| BC9227 | <i>let-455(s1511)</i> | Early                 | 8A2  |
| BC9240 | <i>let-459(s1432)</i> | Not noted             | 9A   |
| BC9257 | <i>let-459(s1615)</i> | Maternal              | 9A   |
| BC9336 | <i>let-463(s2168)</i> | Not noted             | 11B  |

<sup>6</sup> Hatch: Worm's length shorter than 0.2mm

<sup>7</sup> Maternal: Maternal lethal



|        |                       |          |      |
|--------|-----------------------|----------|------|
| BC9341 | <i>let-470(s1581)</i> | Mid      | 20B  |
| BC9299 | <i>let-470(s1629)</i> | Slow     | 20B  |
| BC9309 | <i>let-331(s1608)</i> | Slow     | 10   |
| BC9221 | <i>let-326(s238)</i>  | Mid      | 4A   |
| BC9302 | <i>let-327(s247)</i>  | Slow     | 6A   |
| BC9308 | <i>let-331(s427)</i>  | Slow     | 10   |
| BC9270 | <i>let-332(s234)</i>  | Egg      | 15   |
| BC9274 | <i>let-332(s369)</i>  | Egg      | 15   |
| BC9293 | <i>let-334(s383)</i>  | Mid      | 19   |
| BC9290 | <i>let-334(s908)</i>  | Early    | 19   |
| BC9224 | <i>let-338(s1020)</i> | Mid      | 8A2  |
| BC9298 | <i>let-340(s1022)</i> | Mid      | 19   |
| BC9241 | <i>let-342(s1029)</i> | Mid      | 9B   |
| BC9268 | <i>let-343(s1025)</i> | Egg      | 15   |
| BC9222 | <i>let-345(s578)</i>  | Mid      | 9B   |
| BC9245 | <i>let-350(s250)</i>  | Sterile  | 10   |
| BC9294 | <i>let-405(s388)</i>  | Mid      | 16   |
| BC9252 | <i>let-420(s1046)</i> | Sterile  | 10   |
| BC9297 | <i>let-424(s384)</i>  | Sterile  | 17   |
| BC9307 | <i>let-428(s1070)</i> | Sterile  | 10   |
| BC9331 | <i>let-466(s1063)</i> | Maternal | 8A2  |
| BC9249 | <i>let-466(s990)</i>  | Maternal | 8A2  |
| BC9260 | <i>let-349(s217)</i>  | Early    | 11B1 |
| BC9264 | <i>let-402(s127)</i>  | Mid      | 12A  |
| BC9265 | <i>let-403(s120)</i>  | Mid/Late | 12B  |
| BC9284 | <i>let-405(s116)</i>  | Early    | 16   |
| BC9287 | <i>let-414(s114)</i>  | Mid      | 17   |
| BC9261 | <i>let-417(s204)</i>  | Early    | 10   |

**Table 3. A total of 49 strains with *sDp3***

| <b>Strain</b> | <b><i>let-x(allele)</i></b> | <b>Block</b> | <b>Mapping zone</b> |
|---------------|-----------------------------|--------------|---------------------|
| BC4148        | <i>mel-31(s2438)</i>        | Maternal     | 11.12               |
| BC4149        | <i>let-712(s2439)</i>       | Early        | 1A                  |
| BC4152        | <i>let-771(s2442)</i>       | Sterile      | 5                   |
| BC4156        | <i>let-722(s2448)</i>       | Early        | 1B                  |
| BC4165        | <i>let-719(s2455)</i>       | Sterile      | 11                  |
| BC4166        | <i>let-747(s2456)</i>       | Mid          | 7                   |
| BC4170        | <i>let-757(s2460)</i>       | Not noted    | 2                   |
| BC4173        | <i>let-766(s2463)</i>       | Late         | 1B                  |
| BC4186        | <i>let-741(s2476)</i>       | Early        | 11.12               |
| BC4211        | <i>let-700(s2571)</i>       | Mid          | 13                  |
| BC4213        | <i>let-728(s2573)</i>       | Mid          | 7                   |
| BC4216        | <i>let-780(s2576)</i>       | Sterile      | 9                   |
| BC4217        | <i>let-736(s2577)</i>       | Mid          | 13                  |
| BC4220        | <i>let-763(s2580)</i>       | Early        | 13                  |
| BC4221        | <i>let-743(s2581)</i>       | Early        | 2                   |
| BC4223        | <i>let-972(s2583)</i>       | Early        | 1A                  |
| BC4229        | <i>let-727(s2589)</i>       | Early        | 11                  |
| BC4231        | <i>let-782(s2591)</i>       | Late         | 12                  |
| BC4237        | <i>let-844(s2597)</i>       | Early        | 1A                  |
| BC4238        | <i>let-712(s2598)</i>       | Early        | 1A                  |
| BC4241        | <i>let-783(s2601)</i>       | Embryo       | 5                   |
| BC4242        | <i>let-784(s2602)</i>       | Late         | 11                  |
| BC4251        | <i>let-732(s2611)</i>       | Early        | 12                  |
| BC4254        | <i>let-753(s2614)</i>       | Early        | 11.12               |
| BC4255        | <i>let-774(s2615)</i>       | Early        | 7                   |
| BC4256        | <i>let-764(s2616)</i>       | Early        | 13                  |
| BC4259        | <i>let-752(s2619)</i>       | Mid          | 2                   |
| BC4261        | <i>let-733(s2621)</i>       | Mid          | 12                  |
| BC4271        | <i>let-786(s2631)</i>       | Early        | 1A                  |
| BC4822        | <i>let-823(s2792)</i>       | Early        | 12                  |
| BC4823        | <i>let-824(s2793)</i>       | Late         | 11                  |
| BC4829        | <i>let-815(s2799)</i>       | Early        | 7                   |
| BC4834        | <i>let-821(s2804)</i>       | Early        | 2                   |
| BC4838        | <i>let-732(s2808)</i>       | Maternal     | 12                  |
| BC4840        | <i>let-741(s2810)</i>       | Early        | 11.12               |
| BC4841        | <i>let-826(s2811)</i>       | Sterile      | 11.12               |
| BC4843        | <i>let-702(s2813)</i>       | Early        | 4                   |

|        |                       |           |       |
|--------|-----------------------|-----------|-------|
| BC4845 | <i>let-834(s2815)</i> | Sterile   | 1A    |
| BC4847 | <i>let-832(s2817)</i> | Late      | 11    |
| BC4850 | <i>let-826(s2820)</i> | Sterile   | 11.12 |
| BC4854 | <i>let-797(s2824)</i> | Early     | 9     |
| BC4855 | <i>let-793(s2825)</i> | Maternal  | 5     |
| BC4856 | <i>let-829(s2826)</i> | Early     | 11.12 |
| BC4857 | <i>let-827(s2827)</i> | Sterile   | 11.12 |
| BC4860 | <i>let-743(s2830)</i> | Early     | 2     |
| BC4864 | <i>let-837(s2834)</i> | Mid       | 11.12 |
| BC4880 | <i>let-798(s2850)</i> | Embryo    | 9     |
| BC4882 | <i>let-799(s2852)</i> | Early     | 9     |
| BC5768 | <i>let-757(s2867)</i> | Not noted | 2     |

**Table 4. Strains used in the complementation tests**

| Strain  | Gene                 | Allele        | Genetic balancer*                 |
|---------|----------------------|---------------|-----------------------------------|
| BC4170  | <i>let-757</i>       | <i>s2460</i>  | <i>sDp3</i>                       |
| BC5768  | <i>let-757</i>       | <i>s2867</i>  | <i>sDp3</i>                       |
| BC4834  | <i>let-821</i>       | <i>s2804</i>  | <i>sDp3</i>                       |
| BC4149  | <i>let-712</i>       | <i>s2439</i>  | <i>sDp3</i>                       |
| BC4283  | <i>let-712</i>       | <i>s2598</i>  | <i>sDp3</i>                       |
| BC4225  | <i>let-786</i>       | <i>s2585</i>  | <i>sDp3</i>                       |
| BC4271  | <i>let-786</i>       | <i>s2631</i>  | <i>sDp3</i>                       |
| BC9225  | <i>let-344</i>       | <i>s1555</i>  | <i>eT1;let-500</i>                |
| BC9239  | <i>let-344</i>       | <i>s376</i>   | <i>eT1;let-500</i>                |
| BC1925  | <i>let-341/sos-1</i> | <i>s1031</i>  | <i>eT1</i>                        |
| BC2233  | <i>let-459</i>       | <i>s1432</i>  | <i>eT1</i>                        |
| VC2645  | <i>hpo-18</i>        | <i>ok3436</i> | <i>nT1, CGC</i>                   |
| RM2221  | <i>egl-8</i>         | <i>md1971</i> | <i>discernable phenotype, CGC</i> |
| BC9313  | <i>let-447</i>       | <i>s1457</i>  | <i>eT1;let-500</i>                |
| BC9306  | <i>let-447</i>       | <i>s1654</i>  | <i>eT1;let-500</i>                |
| BC9298  | <i>let-340</i>       | <i>s1022</i>  | <i>eT1;let-500</i>                |
| BC9292  | <i>let-340</i>       | <i>s1508</i>  | <i>eT1;let-500</i>                |
| FX11145 | <i>sup-37</i>        | <i>tm356</i>  | <i>eT1, NBRP</i>                  |
| BC9247  | <i>let-350</i>       | <i>s2126</i>  | <i>eT1;let-500</i>                |
| BC3556  | <i>let-415</i>       | <i>s1505</i>  | <i>eT1</i>                        |

Note\*: *sDp3* and *eT1* used as balancers for isolating the lethal mutations. Some strains were crossed to *let-500* (which is an early blocking lethal on an *eT1* chromosome) to reduce the contribution of homozygous *eT1* containing worms. The knockout alleles (*ok3436*, *tm356*) and the phenotypic allele (*md1971*) were ordered from the National BioResource Project (NBRP)::C. *elegans* and the Caenorhabditis Genetics Center (CGC), which is funded by the NIH Office of Research Infrastructure Programs (P40 OD010440).

#### References:

- Johnsen, R. C., and D. L. Baillie, 1991 Genetic analysis of a major segment [LGV(left)] of the genome of *Caenorhabditis elegans*. *Genetics* 129: 735-752.
- Stewart, H. I., N. J. O'Neil, D. L. Janke, N. W. Franz, H. M. Chamberlin *et al.*, 1998 Lethal mutations defining 112 complementation groups in a 4.5 Mb sequenced region of *Caenorhabditis elegans* chromosome III. *Mol Gen Genet* 260: 280-288.
